# Supplementary material for: Ozonolysis of α-angelica lactone: a renewable route to malonates
Source: Royal Society of Chemistry journal article supplement (doi:10.1039/d1cc03820f), 2021-01-01
Supplement: d1cc03820f1.pdf [file d1cc03820f1.pdf]

## Ozonolysis of $\alpha$ -angelica lactone: a renewable route to malonates

Andrea Dell'Acqua, Lukas Wille, Bernhard M. Stadler, Sergey Tin and Johannes G. de Vries\*

<sup>a</sup>Leibniz Institut für Katalyse e. V. an der Universität Rostock

Albert-Einstein-Strasse 29a, 18055 Rostock

E-mail: [johannes.devries@catalysis.de](mailto:johannes.devries@catalysis.de)

### Supporting Information

#### Table of Contents

|                                       |    |
|---------------------------------------|----|
| 1. General information.....           | S2 |
| 2. Synthetic procedures.....          | S2 |
| 3. Aldehyde trapping experiments..... | S7 |
| 4. Proposed mechanism.....            | S9 |
| 5. References.....                    | S9 |

## 1. General information

**Reagents:**  $\alpha$ -angelica lactone (98%, Sigma Aldrich), hydrogen peroxide (30% aqueous solution, Sigma Aldrich), dimethyl sulfide (>99%, Sigma Aldrich), sodium borohydride (98%, ABCR), palladium on activated charcoal (10% Pd, Fluka) and all the solvents (>99%, Walter) were used as received.

**NMR Spectroscopy:**  $^1\text{H}$ -NMR and  $^{13}\text{C}$ -NMR were recorded at ambient temperature on 300 MHz spectrometers (Avance 300 or Fourier 300) or a 400 MHz spectrometer (Avance 400) from Bruker. The chemical shifts  $\delta$  are given in ppm and referenced to the residual proton signal of the deuterated solvent used.

**Mass spectroscopy:** measurements were recorded on an Agilent 6210 time-of-flight LC/MS (ESI) or on a Thermo Electron MAT 95-XP (EI, 70 eV). Peaks as listed correspond to the highest abundant peak and are of the expected isotope pattern.

**Ozonolysis:** reactions were performed with a Sander model 301.19 ozonizer employing dry compressed air (Figure S1).

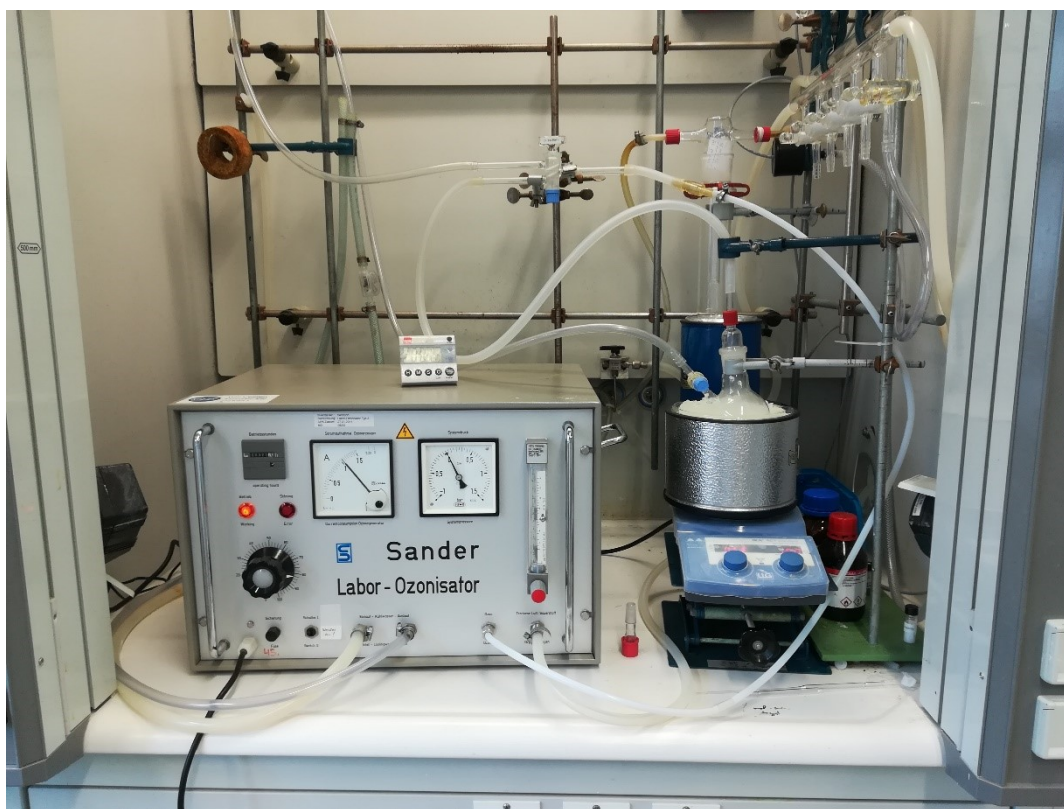

**Figure S1.** Typical set-up for ozonolysis reactions.

## 2. Synthetic procedures

**Malonic acid (MA):**  $\alpha$ -AL (2.50 g, 25.5 mmol) was dissolved in 50 mL of the required solvent (see Table 1 in the main text). The solution was cooled down to the desired temperature (dry ice-acetone or ice-water) and ozone was bubbled through the solution ( $2 \text{ g}\cdot\text{h}^{-1}$ ) until titration with KI showed an excess of ozone. Argon was bubbled through the reaction mixture for 30 minutes, the contents were

carefully poured into hydrogen peroxide cooled at 0 °C (25 mL, 30% aq. solution, 255 mmol, 10 eq) and the resulting solution was stirred for further 20 hours at room temperature. After negative peroxide test, the aqueous layer was extracted with ethyl acetate (4x50 mL), the organic layer was concentrated under reduced pressure and dried *in vacuo* for 6 h. **MA** was obtained as a fine white powder in up to 91% isolated yield (see Tables 1 and 2 in the main text).

<sup>1</sup>H NMR (300 MHz, Acetone-*d*<sub>6</sub>) δ 10.71 (s, 2H), 3.39 (s, 2H). <sup>13</sup>C NMR (300 MHz, Acetone-*d*<sub>6</sub>) δ 168.6, 41.3.<sup>1</sup>

ESI-MS (ES<sup>-</sup>): calculated for C<sub>3</sub>H<sub>4</sub>O<sub>4</sub>: 104.01; found: 103.00 [M-H]<sup>-</sup>.

**Methyl 3,3-dimethoxypropanoate (MOP Acetal):** α-AL (2.50 g, 25.5 mmol) was dissolved in 50 mL of methanol (see Table 1 in the main text). The solution was cooled down to the desired temperature (dry ice-acetone or ice-water) and ozone was bubbled through the solution (2 g\*h<sup>-1</sup>) until titration with KI showed an excess of ozone. Argon was bubbled through the reaction mixture for 30 minutes, the contents were carefully poured into 19 mL of dimethyl sulfide (255 mmol, 10 eq) and stirred for a further 20 hours. The crude was concentrated to about half of the initial volume, then partitioned between water and ethyl acetate and the water phase extracted (4x50 mL EtOAc). The collected organic phases were washed with saturated aqueous NaHCO<sub>3</sub> (100 mL) and brine to remove the residual acetic acid, the volatiles concentrated under reduced pressure affording pure **MOP acetal** as a colourless liquid in up to 46% isolated yield (see Tables 1 and 2 in the main text).

<sup>1</sup>H NMR (300 MHz, Chloroform-*d*) δ 4.82 (t, *J* = 5.6 Hz, 1H), 3.68 (s, 3H), 3.35 (s, 6H), 2.64 (d, *J* = 5.9 Hz, 2H). <sup>13</sup>C NMR (300 MHz, CDCl<sub>3</sub>) δ 170.4, 101.4, 53.6, 51.9, 38.8.<sup>2</sup>

ESI-MS (ES<sup>-</sup>): calculated for C<sub>6</sub>H<sub>12</sub>O<sub>4</sub>: 148.07; found: 147.05 [M-H]<sup>-</sup>.

**Monomethyl malonate (mMM):** The general procedure described for the synthesis of **MA** was repeated using methanol as solvent. **mMM** was obtained after extraction with ethyl acetate and concentration in vacuum as colourless liquid (1.58 g, 52% yield).

<sup>1</sup>H NMR (300 MHz, Chloroform-*d*) δ 3.78 (s, 3H), 3.45 (s, 2H). <sup>13</sup>C NMR (75 MHz, CDCl<sub>3</sub>) δ 171.7, 167.4, 53.1, 41.3.<sup>1</sup>

ESI-MS (ES<sup>-</sup>): calculated for C<sub>4</sub>H<sub>6</sub>O<sub>4</sub>: 118.03; found: 117.05 [M-H]<sup>-</sup>.

**Scaled-up synthesis of MA:** The procedure described for MA synthesis was repeated using 25 g (0.26 mol) of aAL in 500 mL of ethyl acetate. The organic phase was concentrated after negative peroxide test, affording a colourless liquid. **MA** (22.71 g, 86% yield) was obtained as a white solid after extensive drying in vacuum.

# MA

201118.307.10.fid  
 Andrea Dell'Acqua ADE 510  
 Au1H Acetone (C:\Bruker\TopSpin3.6.0) 2011 7

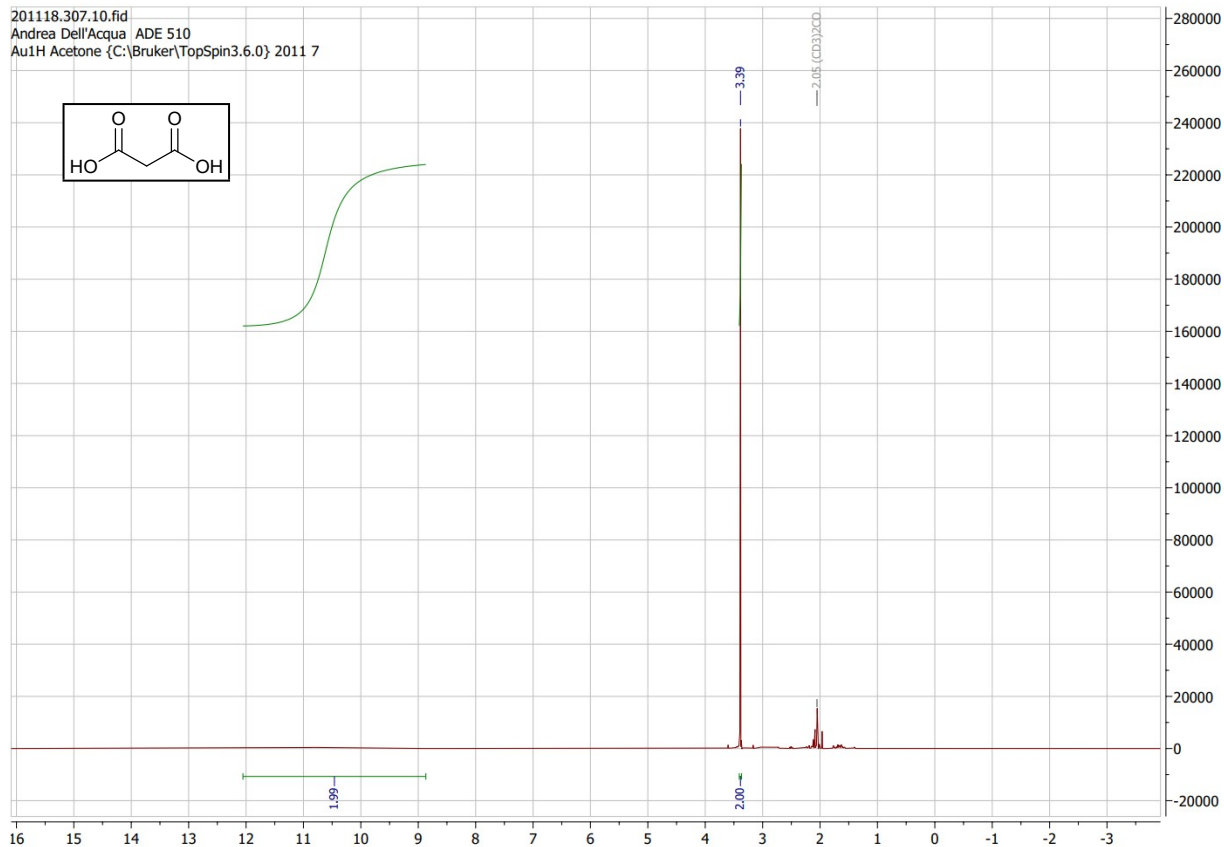

201118.307.11.fid  
 Andrea Dell'Acqua ADE 510  
 Au13C Acetone (C:\Bruker\TopSpin3.6.0) 2011 7

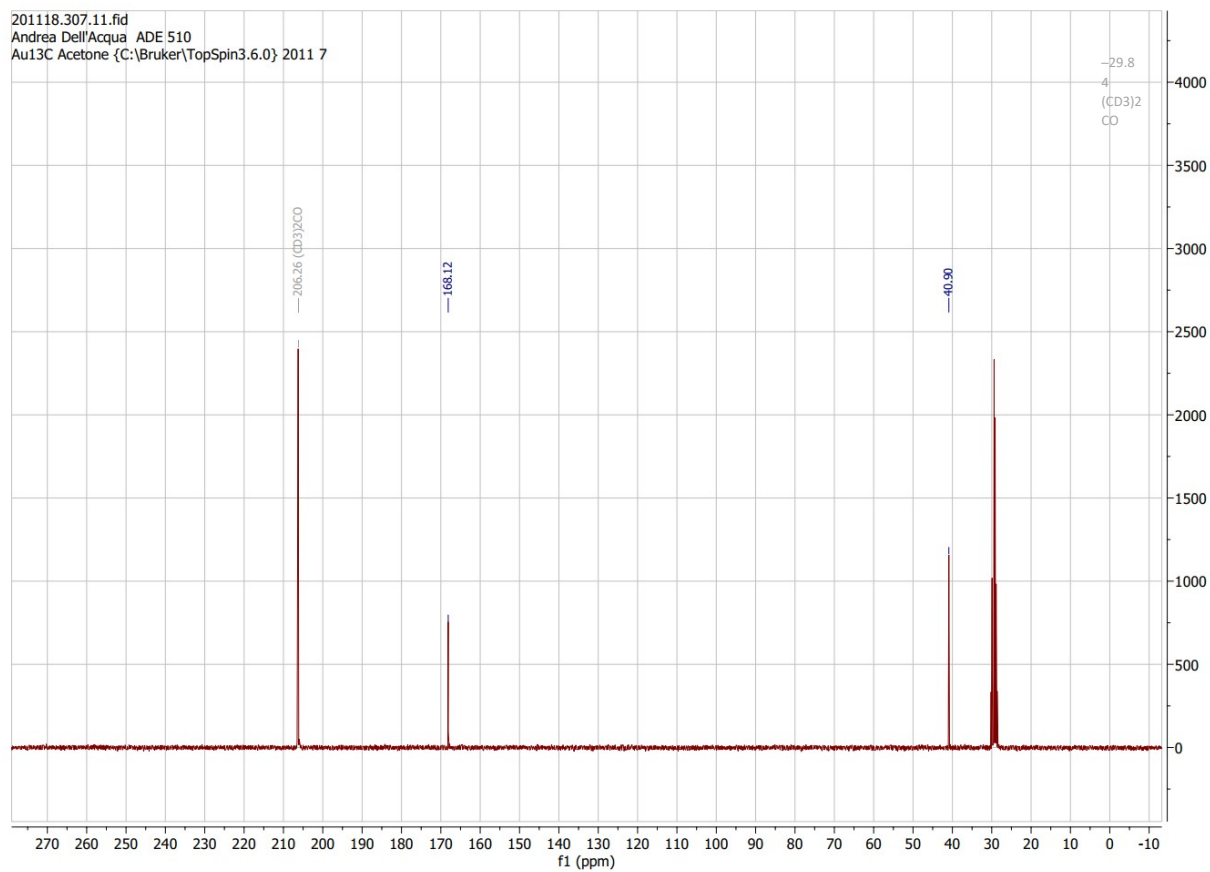

# MOP-acetal

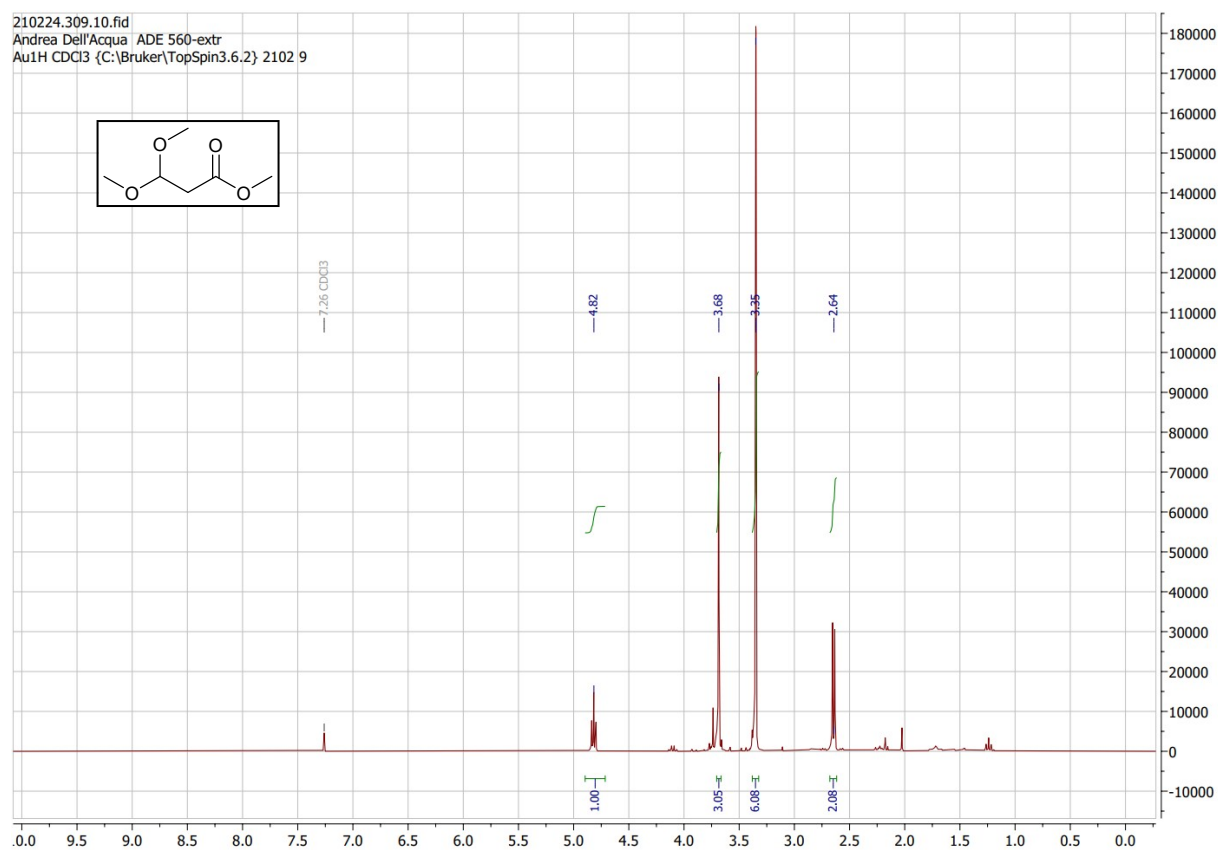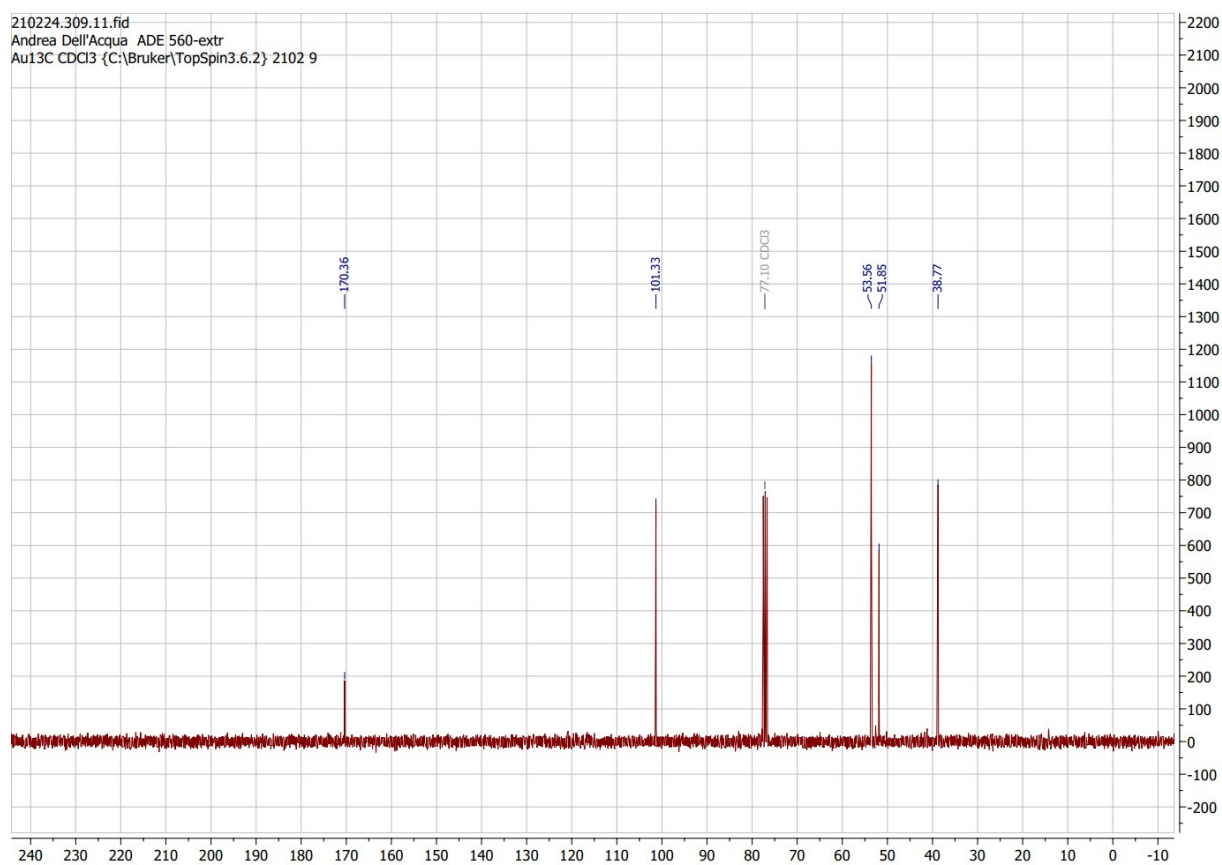

# mMM

210407.f327.10.fid  
Andrea Dell'Acqua ADE 585-liquid  
PROTON CDCI3 {C:\Bruker\TopSpin3.6.2} 2104 27

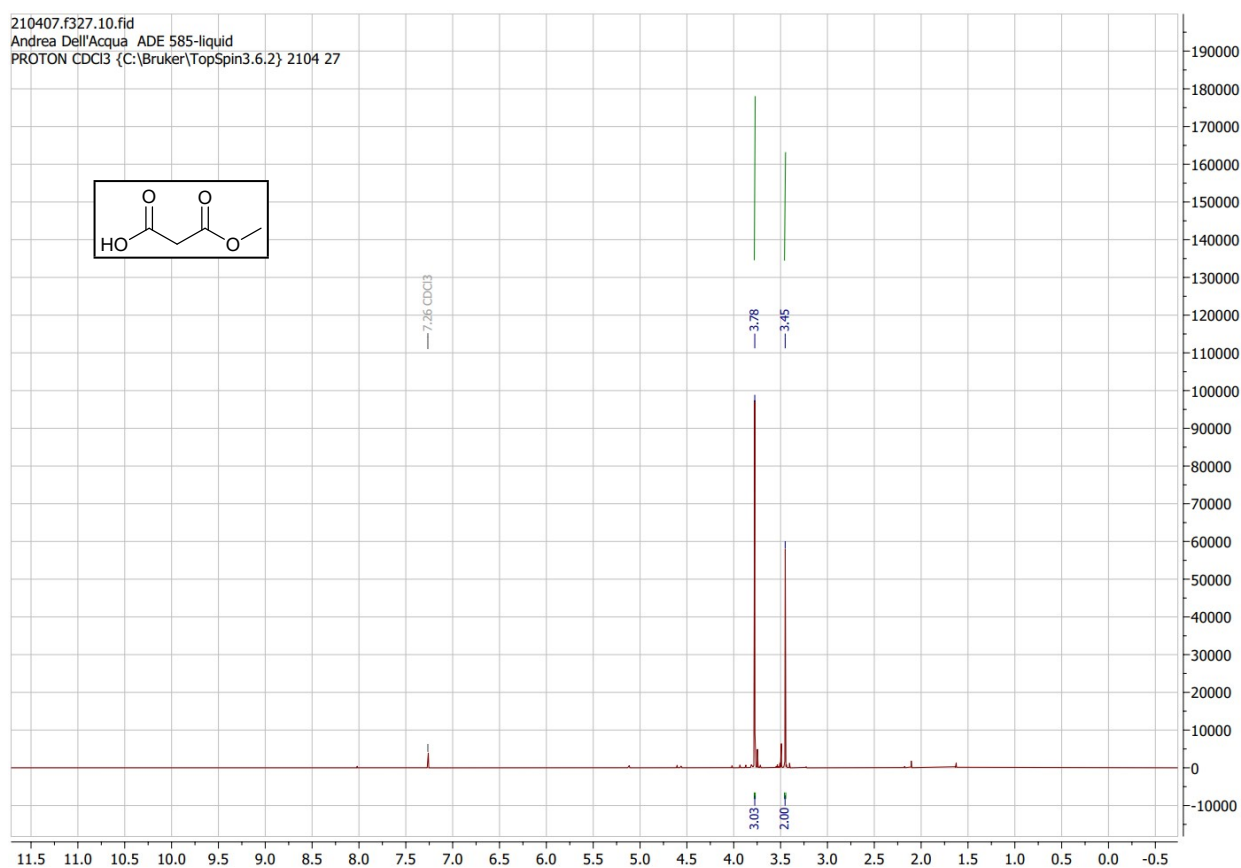

210407.f327.11.fid  
Andrea Dell'Acqua ADE 585-liquid  
C13CPD CDCI3 {C:\Bruker\TopSpin3.6.2} 2104 27

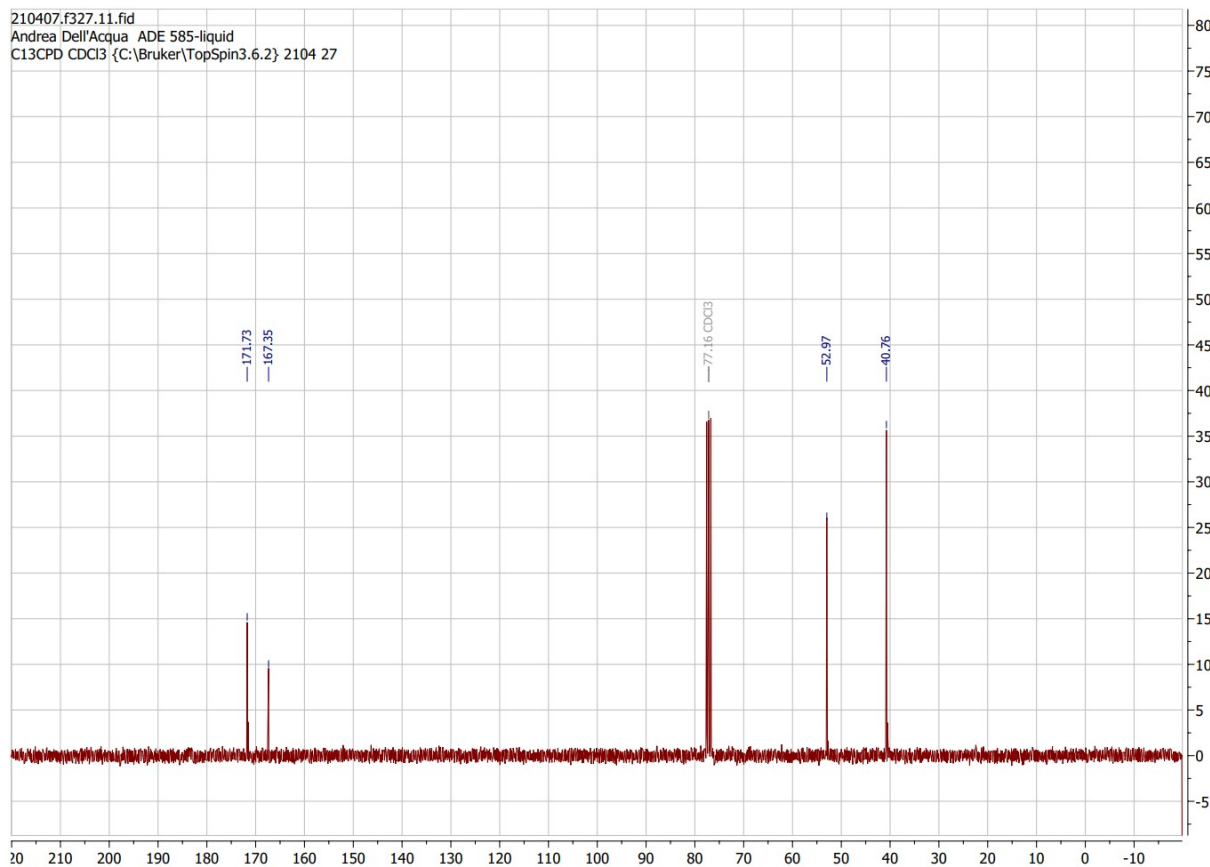

### 3. Aldehyde trapping experiments

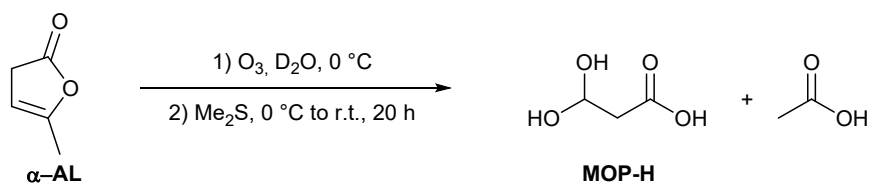

The general procedure described in 2. was repeated, performing the reaction in  $\text{D}_2\text{O}$  (250 mg of  $\alpha\text{-AL}$  in 5.0 mL of  $\text{D}_2\text{O}$ ). A  $^{13}\text{C}$  NMR sample was measured after purging the reaction mixture with argon for 20 minutes, and the remaining solution worked-up following the procedure described above (1.0 mL  $\text{Me}_2\text{S}$  as quenching agent, followed by water-acetate extraction).

#### Before quenching ( $^{13}\text{C}$ in $\text{D}_2\text{O}$ )

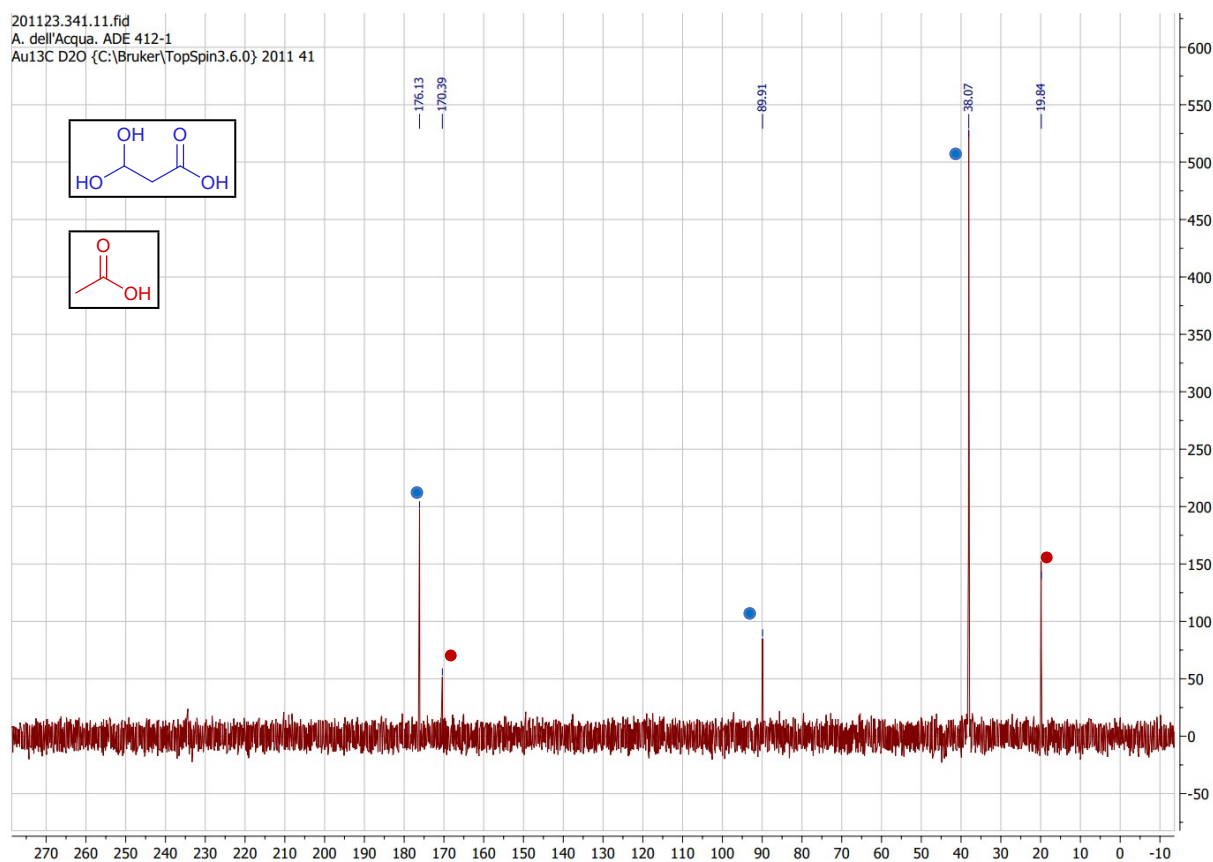

## After quenching with Me<sub>2</sub>S and extraction

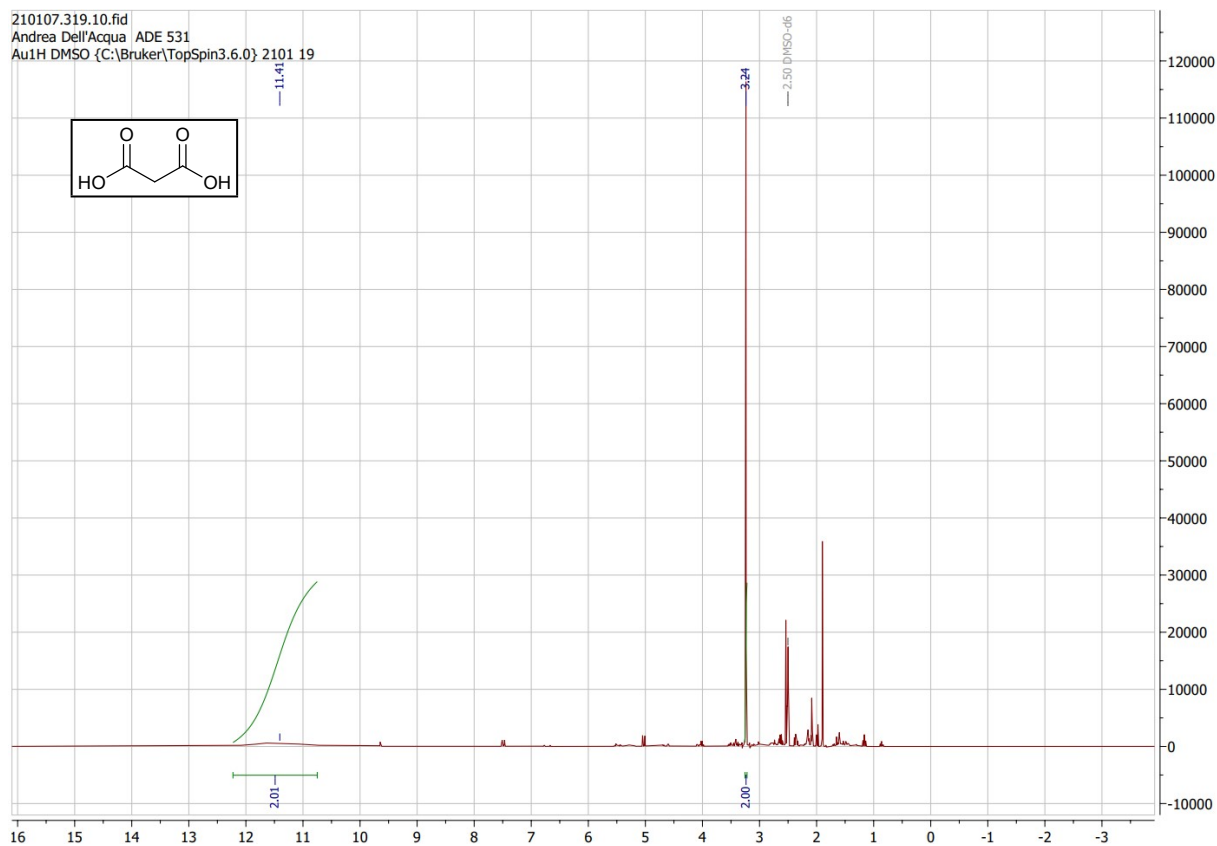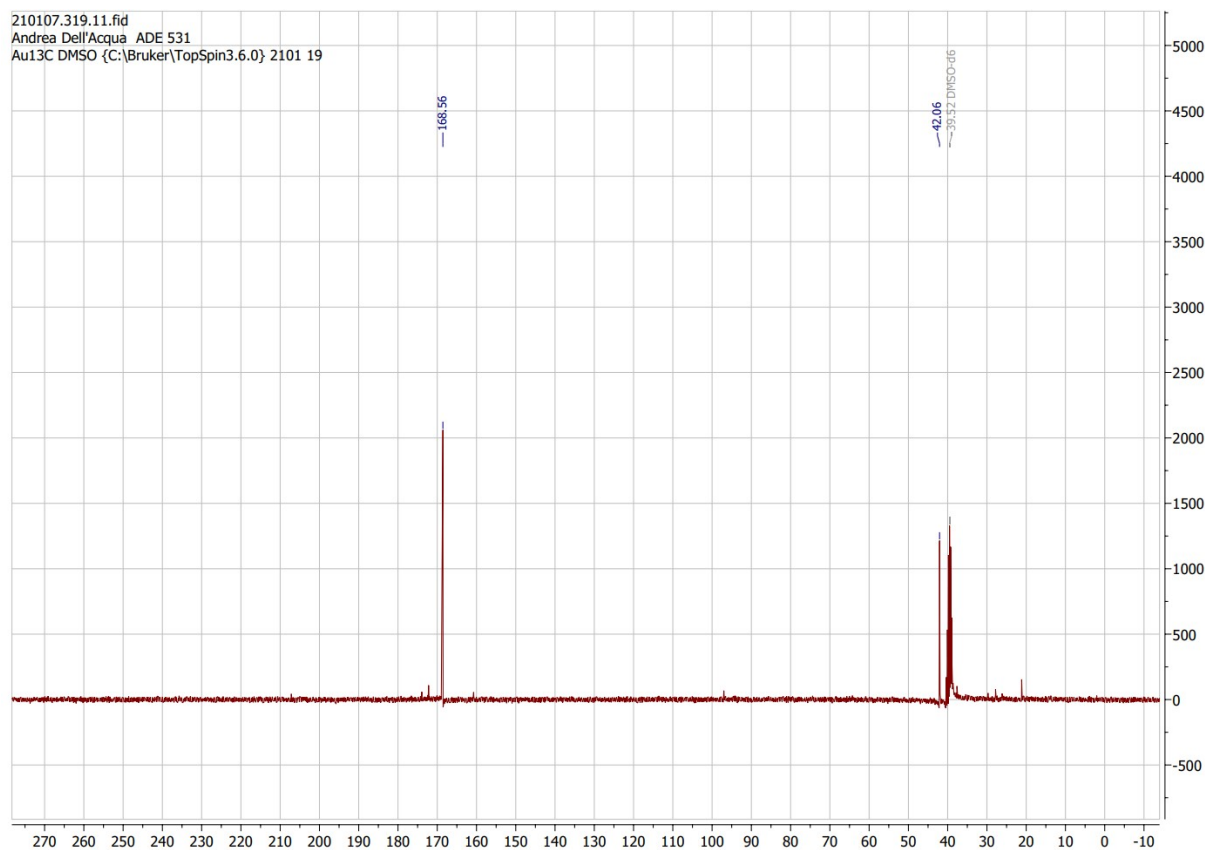



## 5. Proposed mechanism<sup>3, 4</sup>

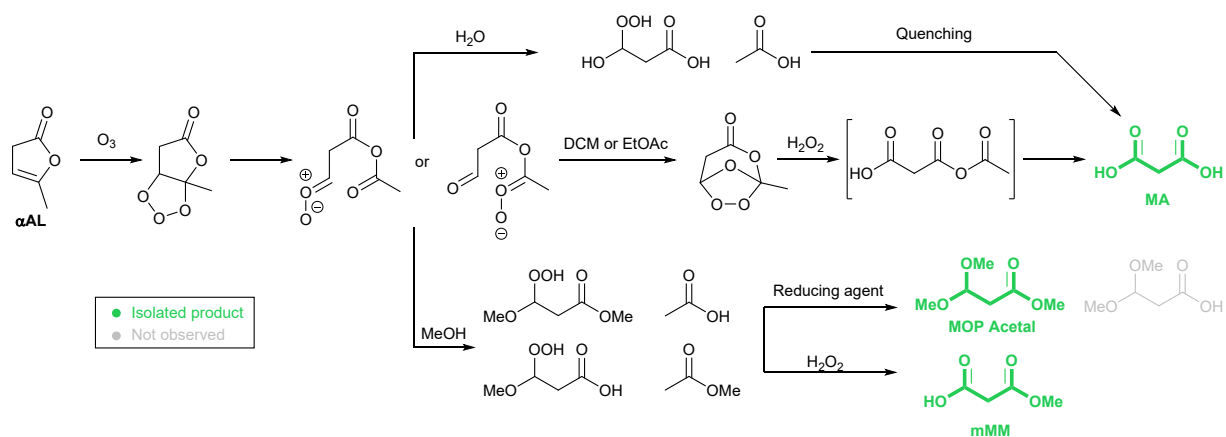

## 4. References

1. F. Rajabi, C. Wilhelm and W. R. Thiel, *Green Chem.*, 2020, **22**, 4438-4444.
2. M. Limbach, S. Dalai and A. de Meijere, *Advanced Synthesis & Catalysis*, 2004, **346**, 760-766.
3. R. Criegee, *Angew. Chem. Int. Ed.*, 1975, **14**, 745-752.
4. R. L. Kuczkowski, *Chem. Soc. Rev.*, 1992, **21**, 79-83.
